# Supplementary material
Source: MDPI journal article supplement (https://www.mdpi.com/search?q=toxins-10-00178)
Supplement: s001 [file toxins-10-00178-s001.pdf]

# Supplementary Materials: Development of an Analytical Method for Simultaneous Determination of the Modified Forms of 4,15-Diacetoxyscirpenol and their Occurrence in Japanese Retail Food

Tomoya Yoshinari, Nanami Takeda, Maiko Watanabe and Yoshiko Sugita-Konishi

Table S1. NMR spectroscopic data for modified forms of 4,15-DAS.

| position                | 7-HDAS (2)   |                                   |                                       |
|-------------------------|--------------|-----------------------------------|---------------------------------------|
|                         | $\delta_C^a$ | $\delta_H$ (J in Hz) <sup>a</sup> | HMBC                                  |
| 2                       | 81.6         | 3.54, d (4.7)                     | 4, 5, 11, 12                          |
| 3                       | 78.2         | 4.20, m                           | 4                                     |
| 4                       | 84.7         | 5.85, d (3.2)                     | 3, 5, 6, 12, <u>COCH<sub>3</sub></u>  |
| 5                       | 50.9         |                                   |                                       |
| 6                       | 48.8         |                                   |                                       |
| 7                       | 68.7         | 4.58, dd (10.1, 6.3)              | 5, 6, 11, 15                          |
| 8                       | 40.4         | 2.14, dd<br>2.32, dd (18.3, 6.3)  | 6, 7, 9, 10                           |
| 9                       | 140.4        |                                   |                                       |
| 10                      | 120.3        | 5.47, m                           |                                       |
| 11                      | 71.6         | 4.49, d (6.0)                     | 7, 9, 10, 15                          |
| 12                      | 65.7         |                                   |                                       |
| 13                      | 47.5         | 3.03, d (4.4)<br>3.07, d (4.4)    | 2, 12                                 |
| 14                      | 9.1          | 1.04, s                           | 4, 5, 6, 12                           |
| 15                      | 63.5         | 4.18, d (12.4)<br>4.57, d (12.4)  | 5, 6, 11, 17, <u>COCH<sub>3</sub></u> |
| 16                      | 22.8         | 1.73, s                           | 8, 9, 10                              |
| <u>COCH<sub>3</sub></u> | 21.0         | 2.10, s                           | <u>COCH<sub>3</sub></u>               |
| <u>COCH<sub>3</sub></u> | 21.2         | 2.07, s                           | <u>COCH<sub>3</sub></u>               |
| <u>COCH<sub>3</sub></u> | 172.5        |                                   |                                       |
| <u>COCH<sub>3</sub></u> | 173.0        |                                   |                                       |

<sup>a</sup> 125 MHz ( $\delta_C$ ) and 500 MHz ( $\delta_H$ ) in CD<sub>3</sub>OD.

| position | 7,8-diHDAS (3)              |                                   |
|----------|-----------------------------|-----------------------------------|
|          | $\delta_C^a$                | $\delta_H$ (J in Hz) <sup>a</sup> |
| 2        | 79.9                        | 3.56, d (4.4)                     |
| 3        | 76.7                        | 4.19, m                           |
| 4        | 83.1                        | 5.86, d (2.8)                     |
| 5        | 49.2                        |                                   |
| 6        | 45.9                        |                                   |
| 7        | 69.4/69.6/69.7 <sup>b</sup> | 3.94, d (5.1)                     |
| 8        | 69.4/69.6/69.7 <sup>b</sup> | 4.26, d (5.1)                     |
| 9        | 140.3                       |                                   |
| 10       | 120.3                       | 5.59, d (5.2)                     |
| 11       | 69.4/69.6/69.7 <sup>b</sup> | 4.52, d (5.2)                     |
| 12       | 63.4/64.2 <sup>c</sup>      |                                   |

|                   |                        |                                |
|-------------------|------------------------|--------------------------------|
| 13                | 48.3                   | 3.03, d (3.7)<br>3.11, d (3.7) |
| 14                | 7.7                    | 1.08, s                        |
| 15                | 63.4/64.2 <sup>c</sup> | 4.46, d (6.8)<br>4.48, d (6.8) |
| 16                | 19.8                   | 1.86, s                        |
| COCH <sub>3</sub> | 19.2                   | 2.08, s                        |
| COCH <sub>3</sub> | 19.4                   | 2.09, s                        |
| COCH <sub>3</sub> | 170.9                  |                                |
| COCH <sub>3</sub> | 171.3                  |                                |

<sup>a</sup> 125 MHz ( $\delta_C$ ) and 500 MHz ( $\delta_H$ ) in CD<sub>3</sub>OD, <sup>b</sup> Assignments uncertain, <sup>c</sup> Assignments uncertain.

| position          | Compound 4                  |                                   |
|-------------------|-----------------------------|-----------------------------------|
|                   | $\delta_C$ <sup>a</sup>     | $\delta_H$ (J in Hz) <sup>a</sup> |
| 2                 | 79.9                        | 3.57, d (4.9)                     |
| 3                 | 76.6                        | 4.20, m                           |
| 4                 | 83.0                        | 5.82, d (3.2)                     |
| 5                 | 49.3                        |                                   |
| 6                 | 45.8                        |                                   |
| 7                 | 68.1/69.4/71.2 <sup>b</sup> | 4.67, d (5.5)                     |
| 8                 | 68.1/69.4/71.2 <sup>b</sup> | 5.75, d (5.5)                     |
| 9                 | 136.1                       |                                   |
| 10                | 123.8                       | 5.82, d (5.7)                     |
| 11                | 68.1/69.4/71.2 <sup>b</sup> | 4.56, d (5.7)                     |
| 12                | 62.7/64.0 <sup>c</sup>      |                                   |
| 13                | 46.9                        | 3.03, d (4.1)<br>3.09, d (4.1)    |
| 14                | 7.6                         | 1.03, s                           |
| 15                | 62.7/64.0 <sup>c</sup>      | 4.40, d (11.8)<br>4.51, d (11.8)  |
| 16                | 18.7                        | 1.73, s                           |
| COCH <sub>3</sub> | 19.4                        | 2.08, s                           |
| COCH <sub>3</sub> | 19.5                        | 2.09, s                           |
| COCH <sub>3</sub> | 19.7                        | 2.10, s                           |
| COCH <sub>3</sub> | 170.9                       |                                   |
| COCH <sub>3</sub> | 171.3                       |                                   |
| COCH <sub>3</sub> | 171.4                       |                                   |

<sup>a</sup> 125 MHz ( $\delta_C$ ) and 500 MHz ( $\delta_H$ ) in CD<sub>3</sub>OD, <sup>b</sup> Assignments uncertain, <sup>c</sup> Assignments uncertain.

| position | 4,15-diANIV (5)         |                                   |                                |
|----------|-------------------------|-----------------------------------|--------------------------------|
|          | $\delta_C$ <sup>a</sup> | $\delta_H$ (J in Hz) <sup>a</sup> | HMBC                           |
| 2        | 81.7                    | 3.69, d (5.0)                     | 4, 5, 11, 12                   |
| 3        | 78.1                    | 4.29, m                           | 4                              |
| 4        | 83.7                    | 5.63, d (3.5)                     | 3, 5, 6, 12, COCH <sub>3</sub> |
| 5        | 51.1                    |                                   |                                |
| 6        | 53.8                    |                                   |                                |
| 7        | 74.8                    | 4.87, s                           | 5, 6, 8, 15                    |
| 8        | 200.8                   |                                   |                                |
| 9        | 137.5                   |                                   |                                |
| 10       | 139.3                   | 6.62, d (5.8)                     | 6, 8, 11, 16                   |
| 11       | 70.7                    | 4.76, d (5.8)                     | 7, 9, 10, 15                   |
| 12       | 65.7                    |                                   |                                |

|                         |       |                                  |                                       |
|-------------------------|-------|----------------------------------|---------------------------------------|
| 13                      | 47.0  | 3.03, d (4.2)<br>3.06, d (4.2)   | 2, 12                                 |
| 14                      | 8.2   | 0.98, s                          | 4, 5, 6, 12                           |
| 15                      | 63.3  | 4.15, d (12.4)<br>4.58, d (12.4) | 5, 6, 11, 17, <u>COCH<sub>3</sub></u> |
| 16                      | 15.5  | 1.86, s                          | 8, 9, 10                              |
| <u>COCH<sub>3</sub></u> | 20.8  | 1.93, s                          | <u>COCH<sub>3</sub></u>               |
| <u>COCH<sub>3</sub></u> | 20.8  | 2.10, s                          | <u>COCH<sub>3</sub></u>               |
| <u>COCH<sub>3</sub></u> | 172.2 |                                  |                                       |
| <u>COCH<sub>3</sub></u> | 172.5 |                                  |                                       |

<sup>a</sup> 125 MHz ( $\delta_C$ ) and 500 MHz ( $\delta_H$ ) in CD<sub>3</sub>OD.

**Table S2.** LC-MS/MS parameters for the developed method in the present study.

| Analyte                                                                                            | Precursor ion<br>( <i>m/z</i> ) | Product ion ( <i>m/z</i> ) <sup>a</sup> | Collision energy<br>(eV) |
|----------------------------------------------------------------------------------------------------|---------------------------------|-----------------------------------------|--------------------------|
| 4,15-diacetoxyscirpenol                                                                            | 384                             | 307                                     | 17                       |
|                                                                                                    |                                 | 247                                     | 19                       |
| 7-hydroxydiacetoxyscirpenol                                                                        | 400                             | 105                                     | 37                       |
|                                                                                                    |                                 | 215                                     | 21                       |
| neosolaniol                                                                                        | 400                             | 185                                     | 25                       |
|                                                                                                    |                                 | 215                                     | 21                       |
| 7,8-dihydroxydiacetoxyscirpenol                                                                    | 416                             | 121                                     | 31                       |
|                                                                                                    |                                 | 213                                     | 25                       |
| 4,15-diacetylnivalenol                                                                             | 414                             | 247                                     | 21                       |
|                                                                                                    |                                 | 137                                     | 31                       |
| 4 $\beta$ ,8 $\alpha$ ,15-triacetoxy-3 $\alpha$ ,7 $\alpha$ -dihydroxy-12,13-epoxytrichothec-9-ene | 458                             | 121                                     | 31                       |
|                                                                                                    |                                 | 213                                     | 23                       |
| T-2 toxin                                                                                          | 484                             | 215                                     | 25                       |
|                                                                                                    |                                 | 185                                     | 29                       |
| HT-2 toxin                                                                                         | 442                             | 215                                     | 19                       |
|                                                                                                    |                                 | 263                                     | 21                       |

<sup>a</sup> top: quantifier ion, bottom: qualifier ion.
